# Supplementary material for: Activating transcription factor 3 promotes embryo attachment via up-regulation of leukemia inhibitory factor in vitro
Source: Springer Nature journal article supplement (doi:10.1186/s12958-017-0260-7), 2017-06-02
Supplement: MOESM3 [file 12335550]

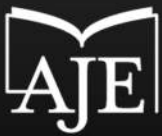

# EDITORIAL CERTIFICATE

This document certifies that the manuscript listed below was edited for proper English language, grammar, punctuation, spelling, and overall style by one or more of the highly qualified native English speaking editors at American Journal Experts.

## Manuscript title:

ATF3 promotes embryo adhesion in vitro though elevating LIF expression

## Authors:

Xi Cheng, Jingyu Liu, Lihua Sun, Chenyang Huang, Qiang Yan, Jialei Shen, Ruiwei Jiang, Lijun Ding, Zhenyu Diao, Yue Jiang, Zhou Jianjun, Guijun Yan, Haixiang Sun

## Date Issued:

March 23, 2016

## Certificate Verification Key:

33BD-62F3-9A19-02E0-7E3C

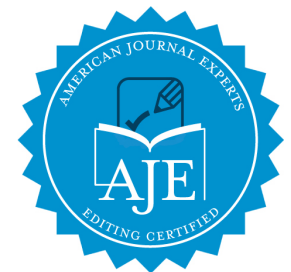

This certificate may be verified at [www.aje.com/certificate](http://www.aje.com/certificate). This document certifies that the manuscript listed above was edited for proper English language, grammar, punctuation, spelling, and overall style by one or more of the highly qualified native English speaking editors at American Journal Experts. Neither the research content nor the authors' intentions were altered in any way during the editing process. Documents receiving this certification should be English-ready for publication; however, the author has the ability to accept or reject our suggestions and changes. To verify the final AJE edited version, please visit our verification page. If you have any questions or concerns about this edited document, please contact American Journal Experts at [support@aje.com](mailto:support@aje.com).
